# Supplementary material for: Aluminum ion intercalation in mesoporous multilayer carbocatalysts promotes the conversion of glucose to 5-hydroxymethylfurfural
Source: Royal Society of Chemistry journal article supplement (doi:10.1039/d3dt04000c), 2024-01-01
Supplement: d3dt04000c1.pdf [file d3dt04000c1.pdf]

## **Aluminum ion intercalation mesoporous multilayer carbocatalyst promotes the conversion of glucose to 5-hydroxymethylfurfural**

Mingfu Li <sup>a, b, c\*</sup>, Liqun Jiang <sup>a</sup>, Sufei Feng <sup>c, d</sup>, Junsheng Huang <sup>a, b</sup>, Pingjun Zhang <sup>a, b\*</sup>  
Jian Zhang <sup>c, d\*</sup>

<sup>a</sup> *Institute of Biological and Medical Engineering, Guangdong Academy of Sciences, Guangzhou, Guangdong 510316, China.*

<sup>b</sup> *Guangdong Province Engineering Research Center for Green Technology of Sugar Industry, Guangzhou, Guangdong 510316, China.*

<sup>c</sup> *Ningbo Institute of Materials Technology & Engineering, Chinese Academy of Sciences, Ningbo, Zhejiang 315201, China.*

<sup>d</sup> *University of Chinese Academy of Sciences, Beijing 100049, China.*

*\*Corresponding Author E-mail: limingfuzd51@126.com*

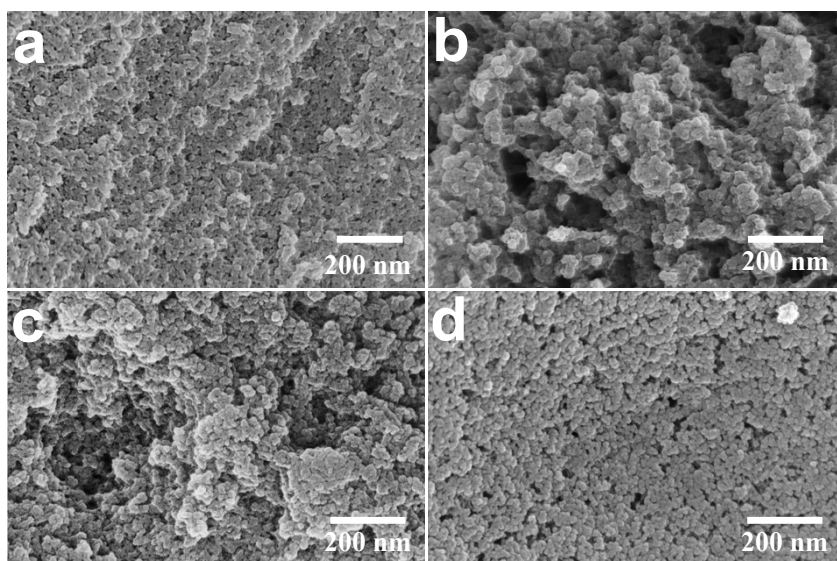

**Fig. S1** SEM of different carbon materials (a) SC (b) PSCA; (c) Al-PSCA1; (d) Al-PSCA3.

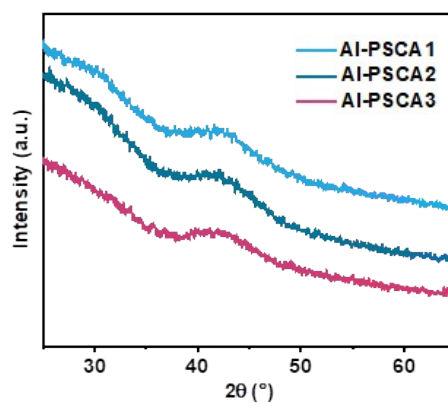

**Fig. S2** XRD analysis of Al-PSCA carbocatalysts.

**Table S1** XPS analysis and Raman analysis results of carbon materials

| Samples  | Chemical composition (at%) |       |      |      |      | Raman analysis ( $I_D/I_G$ ) |
|----------|----------------------------|-------|------|------|------|------------------------------|
|          | C                          | O     | S    | Cl   | Al   |                              |
| SC       | 73.52                      | 26.48 | 0.64 | 0    | 0    | 0.29                         |
| PSCA     | 76.34                      | 19.92 | 3.74 | 0    | 0    | 0.37                         |
| Al-PSCA1 | 77.06                      | 19.54 | 1.37 | 0.46 | 1.57 | 0.32                         |
| Al-PSCA2 | 74.55                      | 20.38 | 2.97 | 0.36 | 1.74 | 0.33                         |
| Al-PSCA3 | 76.25                      | 17.44 | 4.15 | 0.34 | 1.82 | 0.35                         |

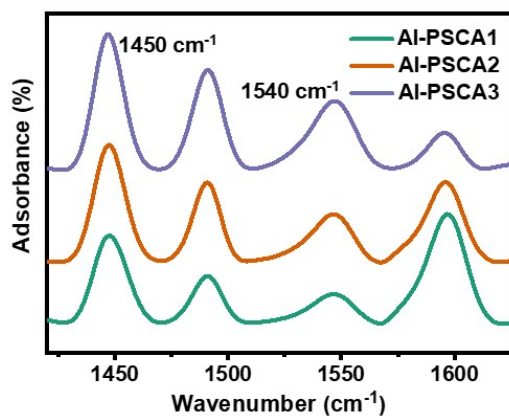

**Fig. S3** Py-FTIR analysis of Al-PSCA catalysts.

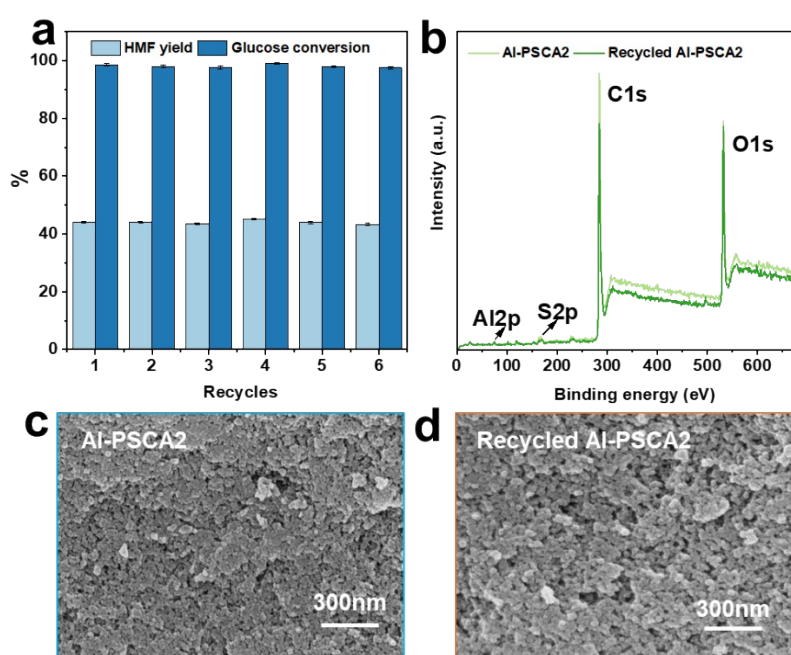

**Fig. S4** Recyclability of catalysts. (a) Catalysts recycle, (b) XPS analysis, SEM analysis of Al-PSCA2 (c) and recycled Al-PSCA2 (d). Reaction condition: 20 mL THF-H<sub>2</sub>O ( $V_{\text{THF}}/V_{\text{H}_2\text{O}}=4/1$ ), 150 °C 2 h, 0.5 mM glucose, 90 mg catalysts.

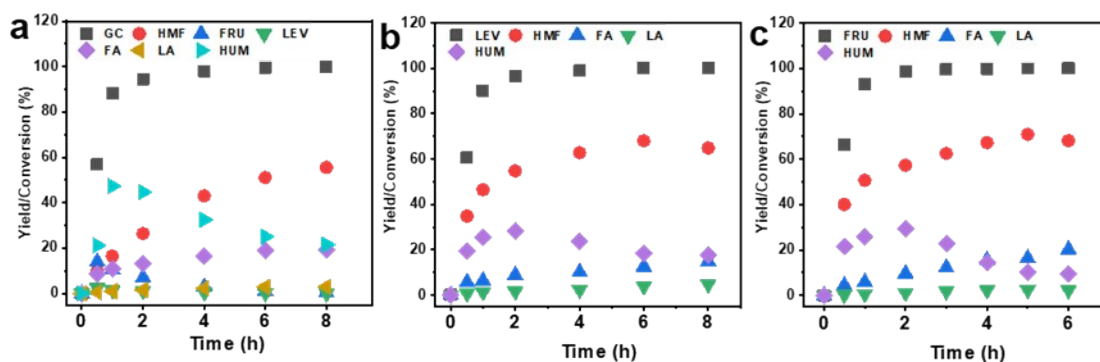

**Fig. S5** Experimental (points) versus calculated kinetic parameter. (a) glucose, (b) levoglucosan, (c) fructose Reaction condition: 20 mL THF-H<sub>2</sub>O ( $V_{\text{THF}}/V_{\text{H}_2\text{O}}=4/1$ ), 140°C, 0.5 mM substrates, 90 mg catalysts.
